# Supplementary material for: Regeneration of glass nanofluidic chips through a multiple-step sequential thermochemical decomposition process at high temperatures
Source: Royal Society of Chemistry journal article supplement (doi:10.1039/c5lc00604j), 2015-01-01
Supplement: c5lc00604j1.pdf [file c5lc00604j1.pdf]

## Electronic supplementary information (ESI)

### **Regeneration of Glass Nanofluidic Chips through a Multiple-Step Sequential Thermochemical Decomposition Process at High Temperatures**

Yan Xu,<sup>\*a</sup> Qian Wu,<sup>ab</sup> Yuji Shimatani<sup>ab</sup>, Koji Yamaguchi<sup>ac</sup>

<sup>a</sup> *Nanoscience and Nanotechnology Research Center, Research Organization for the 21st Century, Osaka Prefecture University, 1-2, Gakuen-cho, Naka-ku, Sakai, Osaka 599-8570, Japan. E-mail: y-xu@21c.osakafu-u.ac.jp; Fax: +81-72-254-7813; Tel: +81-72-254-7813*

<sup>b</sup> *Department of Chemistry, Graduate School of Science, Osaka Prefecture University, 1-1, Gakuen-cho, Naka-ku, Sakai, Osaka 599-8531, Japan*

<sup>c</sup> *Department of Quantum and Radiation Engineering, Graduate School of Engineering, Osaka Prefecture University, 1-1, Gakuen-cho, Naka-ku, Sakai, Osaka 599-8531, Japan*

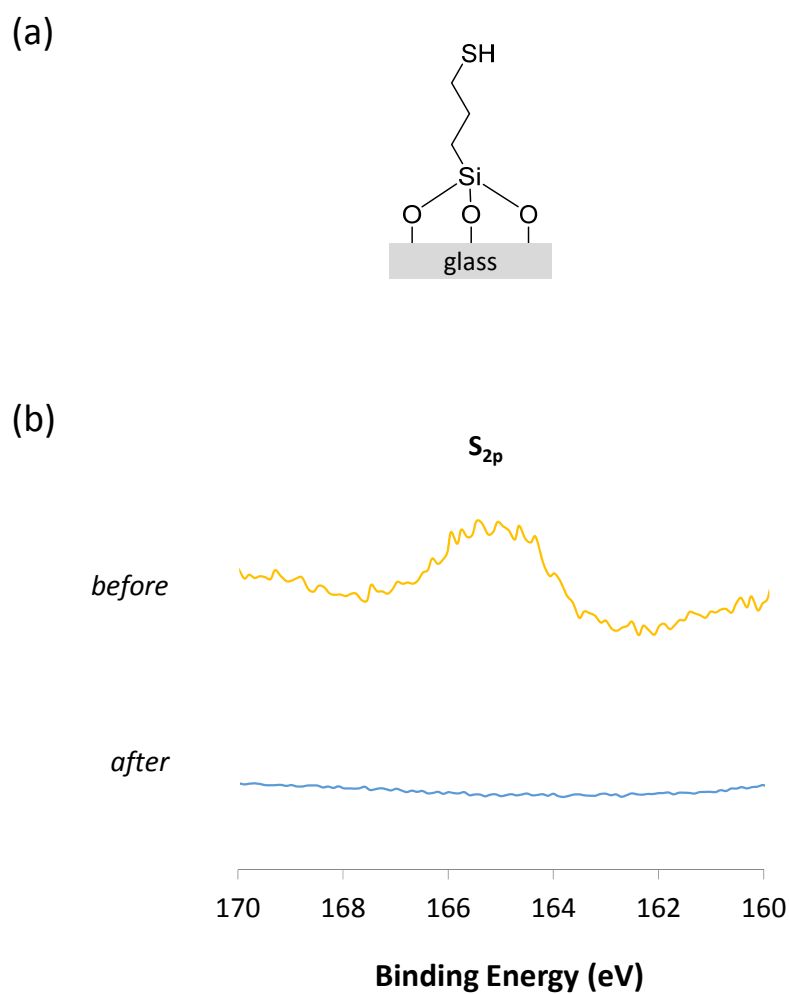

**Fig. S1** XPS spectra of sulfur ( $S_{2p}$ ) on (a) 3-mercaptopropyltrimethoxysilane (MPTS) modified glass substrates (b) before and after treated by the regeneration process. The MPTS modified glass substrates were prepared using an absolute ethanol solution of MPTS (2.5 wt%) according to a silanization process reported by C. R. Vistas et al. (*Appl. Surf. Sci.*, 2013, **286**, 314–318).

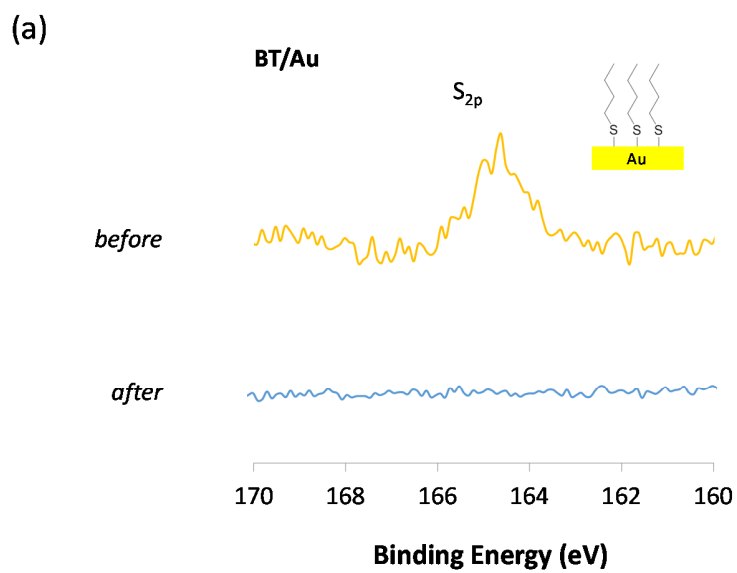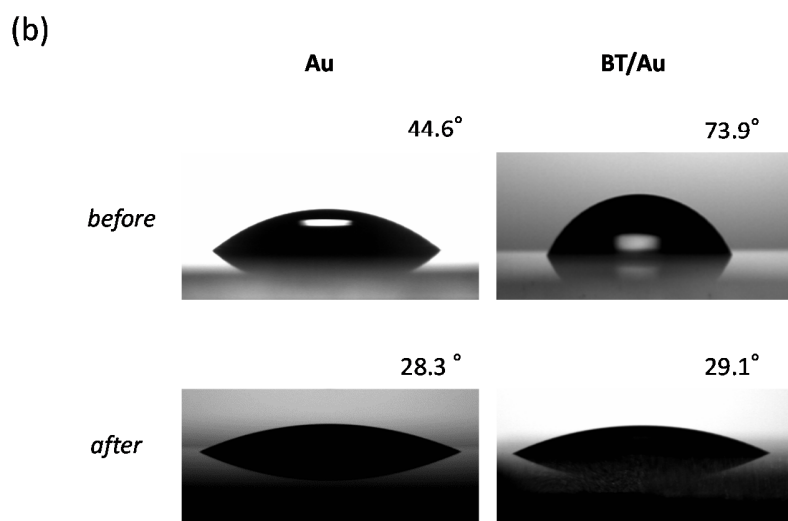

**Fig. S2** (a) XPS spectra of sulfur ( $S_{2p}$ ) and (b) water contact angle measurements on the gold-deposited glass substrates with hydrophobic 1-butanethiol (BT) SAMs before and after treated by the regeneration process.

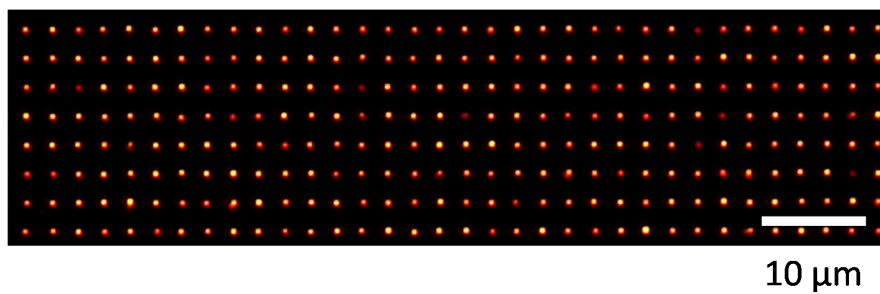

**Fig. S3** A bright-field image of the gold nanoarrays after the second-time regeneration.
